# Supplementary material for: Risikofaktorenanalyse zu den Gründen des Ausscheidens aus der fachärztlichen Weiterbildung im Fach Orthopädie und Unfallchirurgie
Source: Springer Nature journal article supplement (doi:10.1007/s00113-022-01249-x), 2022-11-10
Supplement: MOESM1 [file 23697910]

## OUT VORAUS Survey Biografie

1. Wie alt waren Sie beim Beginn Ihrer orthopädischen/unfallchirurgischen Facharztweiterbildung? (**Alter in Jahren, z.B. 27**)

- Skala: 20-67

2. Im welchem **Ausbildungsjahr** der Facharztweiterbildung befinden Sie sich aktuell?

- a) 1.-2. Jahr (Common Trunk)
- b) 3.-4. Jahr (Special Trunk)
- c) 5.-6. Jahr (Special Trunk)
- d) Bereits Facharzt\*ärztin

3. Welchem **Geschlecht** fühlen Sie sich zugehörig?

- a) Weiblich
- b) Männlich
- c) Divers

## OUT VORAUS Survey

### Privatleben

4. Sind Sie in der Region (<150km Pendlerdistanz) aufgewachsen, in der Sie arbeiten bzw. gearbeitet haben?

- *Ja/Nein*

5. Fühlen Sie sich in der Stadt wohl, in der Sie arbeiten bzw. gearbeitet haben?

- *Ja/Nein*

6. Haben Sie **Freizeitaktivitäten**, die sie regelmäßig wahrnehmen (mindst. >1x pro Woche, 1h Dauer)? (Mehrfachnennung möglich)

- a) *Keine*
- b) *Sportliche Aktivität*
- c) *Spielen von Musikinstrumenten*
- d) *Soziales Engagement*
- e) *Sonstiges (bitte angeben)*

7. Haben Sie oder nehmen Sie in Ihrer Freizeitaktivität (Frage 6) an vergleichenden **Wettbewerben** teilgenommen?

- *Ja/Nein*

8. Befanden Sie sich zu irgendeinem Zeitpunkt der Weiterbildung in einer **festen Partnerschaft**?

- *Ja/Nein*

9. **Falls** ja, wo lebt/lebte Ihr Partner?

- a) *Zusammen im selben Haushalt*
- b) *Weniger als 50km entfernt*
- c) *Mehr als 50km entfernt*

## OUT VORAUS Survey Initiale Karriereplanung

10. Mit welcher **beruflichen Zielsetzung** haben Sie die Facharztweiterbildung begonnen? (Mehrfachnennung möglich)

- a) *Niederlassung als Facharzt (ambulanter Sektor)*
- b) *Karriere im Krankenhaus (stationäre Versorgung)*
- c) *Wissenschaftliche Karriere*
- d) *Berufliche Tätigkeiten außerhalb der direkten Patientenversorgung (z.B. Krankenhausmanagement, Versicherung, MDK, etc.)*
- e) *Zu Beginn keine definierte Zielsetzung*

11. **Wenn wissenschaftliche Karriere:** Wann führen Sie die wissenschaftliche Tätigkeit durch?

- a) *Überwiegend in meiner Freizeit*
- b) *Überwiegend in der Arbeitszeit (temporäre Freistellung)*
- c) *Während einer Forschungsrotation*

12. Wo haben Sie zu Beginn der Weiterbildung in O&U Ihren **größten Interessenschwerpunkt** gesehen?

- a) *Notfallversorgung (Präklinisch/ Schockraumversorgung)*
- b) *Allgemeine Traumatologie*
- c) *Alterstraumatologie*
- d) *Allgemeine Orthopädie*
- e) *Kinderorthopädie*
- f) *Sporttraumatologie/-orthopädie*
- g) *Keinen Schwerpunkt*

## OUT VORAUS Survey

### Weiterbildungsbeginn

13. Erfolgte vor der Einstellung eine **Hospitation**?

- a) **1 Tag** Dauer
- b) Bis zu **1 Woche** Dauer
- c) Bis zu **1 Monat** Dauer
- d) **PJ/Famulatur** in der Klinik
- e) *Nein*

14. Mit welchen Berufsgruppen des Krankenhauses haben Sie vor Ihrer Einstellung ein Gespräch geführt? (Mehrfachnennung möglich)

- a) Mit anderen **Assistenzärzt\*innen**
- b) Mit dem **Oberarzt\*ärztin**
- c) Mit dem/der **Chef\*in**
- d) Mit der **Vertretung der Personalabteilung**
- e) *Kein formales Gespräch*

15. In welcher klinischen Versorgungsstufe haben Sie die Weiterbildung begonnen?

- a) *Universitätsklinikum*
- b) *Kommunales Krankenhaus*
- c) *Krankenhaus mit kirchlichem Träger*
- d) *Krankenhaus mit privatem Träger*
- e) *Klinik mit eingeschränkter Weiterbildungsermächtigung*
- f) *Spezialklinik (z.B. Rehabilitationskliniken)*
- g) *Niederlassung/ Praxis (ambulanter Bereich)*

16. Warum haben Sie die Einrichtung für Ihre Weiterbildung ausgewählt?  
**(wichtigster Grund)**

- a) *Kenntnis der Klinik durch **persönliche Erfahrungen** vor Ort (Studium, Famulatur, Praktisches Jahr)*
- b) *Aufgrund einer **persönlichen Empfehlung***
- c) *Aufgrund der **geografischen Lage** des Weiterbildungsortes*
- d) *Kenntnis der Klinik **durch Ihre Doktorarbeit***
- e) *Aufgrund des **fachlichen Klinikprofils***
- f) *Offenes **Stellenangebot***
- g) *Sonstiges (bitte angeben)*

## OUT VORAUS Survey

### Reale Arbeitsbedingungen

17. **Wie viele** Weiterbildungsassistent\*innen arbeiten in ihrer Klinik

- *Skala: 0-80 (Anzahl der Weiterbildungsassistent\*innen)*

18. Gab/gibt es in Ihrer Klinik eine **Vertretung der Assistent\*innen**?

- *Ja/Nein*

19. Wie hoch ist die derzeitige **effektive wöchentliche Arbeitszeit**?

- a) *<42 Stunden*
- b) *42 – 48 Stunden*
- c) *49 – 54 Stunden*
- d) *>54 Stunden*

20. Wie viele **Bereitschaftsdienste** führen Sie aktuell **pro Monat** durch? (inkl. Ruf- und Spätdiensten)

- a) *Keine*
- b) *1-2*
- c) *3-4*
- d) *5-6*
- e) *7-8*
- f) *>8*

21. Wie viel Prozent (%) der wöchentlichen Arbeitszeit sind sie **im Operationssaal**?

- a) *<20%*
- b) *21-40%*
- c) *41-60%*
- d) *>60%*

22. Wie viel Prozent (%) der wöchentlichen Arbeitszeit verwenden Sie durchschnittlich für die „**Patientenversorgung**“ (Station, Ambulanz, Sprechstunde)?

- a) *<20%*
- b) *21-40%*
- c) *41-60%*
- d) *>60%*

23. Wie viel Prozent (%) der wöchentlichen Arbeitszeit verwenden Sie durchschnittlich für „**Bürokratie**“ / "**nicht-ärztliche**" Tätigkeiten?

- a) *<20%*

- b) 21-40%*
- c) 41-60%*
- d) >60%*

## OUT VORAUS Survey

### Weiterbildungsstruktur

24. Gibt es in Ihrer Klinik ein **verbindliches Ausbildungscurriculum** (z.B. Rotationsplan)?

- a) *Ja, als langfristiges, planbares Konzept*
- b) *Ja, aber regelhaft kurzfristige Änderung (eingeschränkte Planbarkeit)*
- c) *Kein strukturiertes Ausbildungskonzept vorhanden*

25. Wie oft finden **Zielvereinbarungsgespräche** in Ihrer Klinik statt?

- a) *Halbjährig*
- b) *1x im Jahr*
- c) *Unregelmäßig (< 1x im Jahr)*
- d) *Gar nicht*

26. Gibt es in ihrer Klinik regelmäßige **Fortbildungsveranstaltungen** für die Assistent\*innen (z.B. Röntgenbesprechung/ wöchentliche Fortbildungen/ Medizinproduktschulungen/ M&M Konferenzen etc.)?

- a) *Regelmäßig (mindestens 1x/ Woche)*
- b) *Unregelmäßig (weniger als 1x/ Woche)*
- c) *Keine*

27. Wird die Teilnahme an **klinik-externen Kursprogrammen** finanziell und/oder zeitlich gefördert (**ATLS; AE- und AO-Kurse**)?

- *Ja/Nein*

28. Finden Anteile Ihrer Ausbildung **simulatorgestützt** oder im **Wet-Lab** statt?

- *Ja/Nein*

29. Welcher Faktor beeinflusst in Ihrer Klinik primär die **Einteilung als Operateur\*in**?

- a) *Persönliches Sympathieverhältnis zum OP-Plan erstellenden OÄ/OA/Chef\*in*
- b) *Ausbildungsstand*
- c) *Entsprechend des Weiterbildungsplanes*
- d) *Tagesaktuelle personelle Verfügbarkeit*
- e) *Wissenschaftliche Tätigkeit*
- f) *Willkürlich*

30. Werden klinikinterne, gesellschaftliche Veranstaltungen durchgeführt?  
(Mehrfachnennung möglich)

- a) *Nein, nie*

- b) Weihnachtsfeier*
- c) Gemeinsame Ausflüge*
- d) Assistent\*innentreffen*



## OUT VORAUS Survey

### Abschließende Fragen

31. Sie haben während Ihre Facharztweiterbildung in O&U...

- a) Die Klinik **nicht** gewechselt.
- b) Aus **fachlichen Gründen** die Klinik gewechselt
- c) Aus **persönlichen Gründen** die Klinik gewechselt.
- d) Die **Richtung** der Facharztweiterbildung **geändert**
- e) Die Weiterbildung **dauerhaft beendet**

32. Kennen Sie **Kolleg\*innen** aus Ihrer Klinik, die die **Facharztweiterbildung abgebrochen** haben?

- a) Nein
- b) Ja, wieviele? (Zahl)

33. Kennen Sie **Kolleg\*innen** aus Ihrer Klinik, die die **Klinik aus fachlichen Gründen gewechselt** haben?

- a) Nein
- b) Ja, wie viele (Zahl)

## OUT VORAUS Survey

### Persönliche Einstellung

Wir bitten Sie, jede der nun folgenden Aussagen einzeln auf Ihre Relevanz für den erfolgreichen Abschluss der Facharztweiterbildung in O&U zu bewerten.

**(1 gar keine Zustimmung – 6 maximale Zustimmung zur gemachten Aussage)** *(In Form von Likert-Skalen)*

34. Die Einhaltung von tariflich geregelten Arbeitszeiten in der Weiterbildung ist mir wichtig! (**Life-Work-Balance**)

35. Das **rechtzeitige Erscheinen** eines gültigen **Dienstplanes** ist mir wichtig! (mindestens 4 Wochen vorher)

36. Mir ist es wichtig, dass die Klinikleitung regelmäßig eine **klare Erwartungshaltung** an mich formuliert!

37. Eine **breite**, den unmittelbaren fachlichen Schwerpunkt von O&U übertreffende **chirurgische Ausbildung** ist mir wichtig! (z.B. allgemein-, viszeral- oder gefäßchirurgische Ausbildungsabschnitte)

38. Auch die Facharztweiterbildung sollte bereits eine **fachliche Schwerpunktbildung** nach persönlichen Wünschen ermöglichen!

39. Die direkte, persönliche Anleitung bei Tätigkeiten ist mir wichtig! (**Supervision**)

40. Das Vorhandensein von einheitlichen, klinik-internen Standards (**SOP's**) zur Patientenversorgung ist mir wichtig!

41. Regelmäßige, **klinik-interne Fortbildungen** sind mir wichtig! (z.B. Röntgenbesprechung/ wöchentliche Fortbildungen/ Medizinproduktschulungen/ M&M Konferenzen etc.)

42. Die Unterstützung bei dem Besuch von **klinik-externen Ausbildungscurricula** (z.B. ATLS, AO- und AE-Kursen) ist mir wichtig! (**zeitlich und/ oder finanziell**)

43. Die moderne orthopädisch/ unfallchirurgische Weiterbildung soll **praktische Ausbildungsanteile an realitätsnahen Modellen** (Wet-Lab) beinhalten!

## OUT VORAUS Survey

### Persönliches Resümee der Weiterbildung

44. Wurde Ihnen vor dem Antritt der Weiterbildung ein realistisches Bild der Arbeitsumstände vermittelt?

- *Ja/Nein*

45. Werden Sie oder haben Sie zum Ende Ihrer regulären Facharztweiterbildungszeit die Ziele des Facharztecataloges real erreicht?

- *Ja/Nein*

46. Würden Sie abschließend die Facharztweiterbildung „**Orthopädie und Unfallchirurgie**“ als Berufsziel **weiterempfehlen**?

- a) *Uneingeschränkt*
- b) *Ja, in meiner aktuellen Klinik*
- c) *Ja, in einer anderen Klinik*
- d) *Überhaupt nicht*
- e) *Weiß nicht*

## OUT VORAUS Survey

### Informationen zur Beendigung der Weiterbildung

47. Wann wurde die Weiterbildung abgebrochen?

- a) In der **Probezeit**
- b) In den ersten **6 Monaten** der Facharztausbildung
- c) Im **1. Jahr** der Facharztausbildung
- d) Im **2. Jahr** der Facharztausbildung
- e) Im **3. Jahr** der Facharztausbildung
- f) Im **4. Jahr** der Facharztausbildung
- g) Im **5. Jahr** der Facharztausbildung
- h) Im **6. Jahr** der Facharztausbildung

48. Wie erfolgte die Kündigung?

- a) Spontan (**in der Probenzeit**), ohne konkrete weitere berufliche Perspektive
- b) Spontan (**fristlos**), ohne konkrete weitere berufliche Perspektive
- c) Geplant (**fristgerecht**), mit konkreter weiterer beruflicher Perspektive

49. In welchem Bereich lagen die Gründe der Kündigung?

- a) Persönliches Umfeld
- b) Arbeitsumfeld

50. Aus welchem Grund/Gründen haben Sie die Weiterbildung abgebrochen bzw. welche Kritikpunkte sehen Sie in Ihrer derzeitigen Weiterbildung?  
(Mehrfachnennung möglich)

- a) Starke Arbeitsbelastung während der regulären Arbeitszeit
- b) Überstunden, Mangel an Freizeit
- c) Psychischer Stress durch fatale Krankheitsbilder und Verläufe
- d) Mangelnde operative Ausbildung
- e) Psychischer Stress durch hohe Verantwortung
- f) Zu viel administrative Tätigkeit
- g) Zu geringes Gehalt
- h) Spannungen im Team
- i) Hierarchie in der Klinik/Umgangston
- j) Belastung durch Forschungsprojekte
- k) Fehlende strukturierte Weiterbildung
- l) Benachteiligung auf Grund ihres Geschlechts
- m) Benachteiligung auf Grund ihrer Herkunft
- n) Benachteiligung auf Grund von Familiengründung/-planung bzw. mangelnde Familienkompatibilität der Weiterbildung

## OUT VORAUS Survey

51. Aus welchem Grund/Gründen haben Sie die Weiterbildung abgebrochen bzw. welche Kritikpunkte sehen Sie in Ihrer derzeitigen Weiterbildung?  
(Mehrfachnennung möglich)

- a) *Starke Arbeitsbelastung während der regulären Arbeitszeit*
- b) *Überstunden, Mangel an Freizeit*
- c) *Psychischer Stress durch fatale Krankheitsbilder und Verläufe*
- d) *Mangelnde operative Ausbildung*
- e) *Psychischer Stress durch hohe Verantwortung*
- f) *Zu viel administrative Tätigkeit*
- g) *Zu geringes Gehalt*
- h) *Spannungen im Team*
- i) *Hierarchie in der Klinik/Umgangston*
- j) *Belastung durch Forschungsprojekte*
- k) *Fehlende strukturierte Weiterbildung*
- l) *Benachteiligung auf Grund ihres Geschlechts*
- m) *Benachteiligung auf Grund ihrer Herkunft*
- n) *Benachteiligung auf Grund von Familiengründung/-planung bzw. mangelnde Familienkompatibilität der Weiterbildung*

Ende der Umfrage

Vielen Dank für Ihre Teilnahme!

58. Zur Teilnahme an der Verlosung der Buchgutscheine können sie nun noch freiwillig Ihre Kontaktdaten eingeben:

Name

E-Mail-Adresse
